# Supplementary material for: Prospective validation of microRNA signatures for detecting pancreatic malignant transformation in endoscopic-ultrasound guided fine-needle aspiration biopsies
Source: PubMed Central journal article supplement (PMC5053745; doi:10.18632/oncotarget.8699), 2016-04-12
Supplement: oncotarget-07-28556-s001.pdf [file oncotarget-07-28556-s001.pdf]

## Prospective validation of microRNA signatures for detecting pancreatic malignant transformation in endoscopic-ultrasound guided fine-needle aspiration biopsies

### Supplementary Materials

**Supplementary Table S1: Areas under the ROC curve for assessing combinations of miRNAs for discriminating between malignant and non-malignant pancreatic EUS-FNAs**

|             | miR-21 | miR-10b                | miR-155                              | miR-196a               | miR-210                | miR-135b/24            |
|-------------|--------|------------------------|--------------------------------------|------------------------|------------------------|------------------------|
| miR-21      |        | 0.841<br>(0.731–0.952) | <b>0.930</b><br><b>(0.868–0.992)</b> | 0.873<br>(0.778–0.968) | 0.852<br>(0.752–0.952) | 0.837<br>(0.729–0.945) |
| miR-10b     |        |                        | 0.926<br>(0.858–0.994)               | 0.837<br>(0.728–0.947) | 0.831<br>(0.716–0.945) | 0.820<br>(0.704–0.936) |
| miR-155     |        |                        |                                      | 0.873<br>(0.778–0.968) | 0.872<br>(0.775–0.968) | 0.877<br>(0.782–0.972) |
| miR-196a    |        |                        |                                      |                        | 0.778<br>(0.658–0.898) | 0.772<br>(0.648–0.897) |
| miR-210     |        |                        |                                      |                        |                        | 0.790<br>(0.672–0.907) |
| miR-135b/24 |        |                        |                                      |                        |                        |                        |

AUC (95% CI).

**Supplementary Table S2: Demographic and clinical description of validation EUS-FNA and FFPE cohorts**

|                           | Validation EUS-FNAs                                       |                         |                | Validation FFPE                   |                                                          |                |
|---------------------------|-----------------------------------------------------------|-------------------------|----------------|-----------------------------------|----------------------------------------------------------|----------------|
|                           | Benign/<br>Inflammatory/<br>Pseudocyst<br>( <i>n</i> = 3) | PDAC<br>( <i>n</i> = 7) | <i>P</i>       | Benign<br>(IPMN,<br><i>n</i> = 5) | Malignant<br>(CEI, <i>n</i> = 5; PDAC<br>( <i>n</i> = 6) | <i>P</i>       |
| Age (years)               | 50.4 ± 26.7                                               | 70.3 ± 9.3              | 0.102†         | 64.0 ± 9.7                        | 71.8 ± 7.5                                               | 0.095†         |
| Female gender (%)         | 2 (66.7%)                                                 | 3 (42.9%)               | 0.490☼         | 4 (80%)                           | 3 (27.3%)                                                | <b>0.049</b> ☼ |
| Symptoms                  | 3 (100%)                                                  | 7 (100%)                | NS☼            | 3 (60%)                           | 8 (72.2%)                                                | 0.611☼         |
| Size (mm)                 | 22.3 ± 7.5                                                | 28.6 ± 7.5              | 0.262†         | 24 ± 9.1                          | 32.8 ± 8.5                                               | 0.074†         |
| Solid or cystic           | 1/2                                                       | 7/0                     | <b>0.016</b> ☼ | 1/4                               | 9/2                                                      | <b>0.018</b> ☼ |
| No. of fine needle passes | 1.7 ± 0.6                                                 | 3.0 ± 0.6               | <b>0.010</b> † | 1.6 ± 0.5                         | 2.3 ± 0.6                                                | 0.061†         |
| RNA yield (ng/μl)         | 274.1 ± 210.4                                             | 59.8 ± 70.3             | <b>0.033</b> † | 258.7 ± 179.0                     | 248.1 ± 135.9                                            | 0.895†         |

PDAC, Pancreatic Ductal Adenocarcinoma; IPMN, intraductal papillary mucinous neoplasm; CEI, Carcinoma-ex-IPMN.  
 ☼Chi-square test. †Unpaired *t*-test. NS, non-significant.
